# Supplementary figures and images for: The phospholipase A2 enzyme complex PAFAH Ib mediates endosomal membrane tubule formation and trafficking
Source: PubMed Central journal article supplement — Mol Biol Cell. 2011 Jul 1;22(13):2348–59. doi: 10.1091/mbc.E09-12-1064 (PMC3128536; doi:10.1091/mbc.e09-12-1064), 2011-07-01

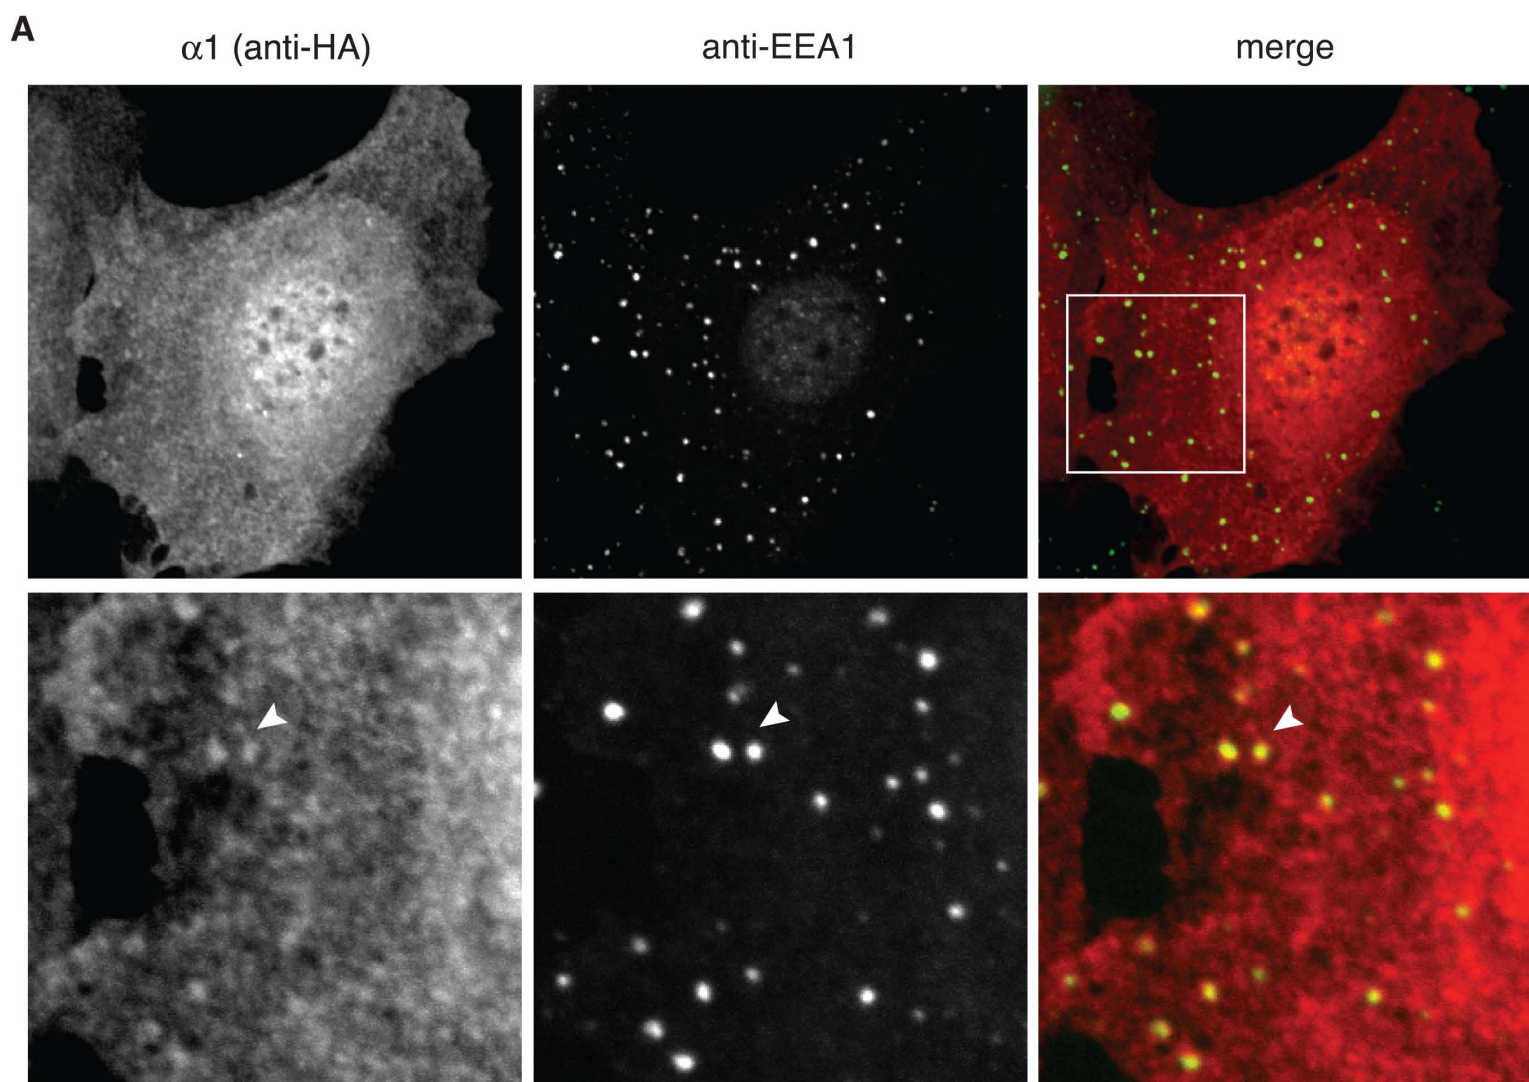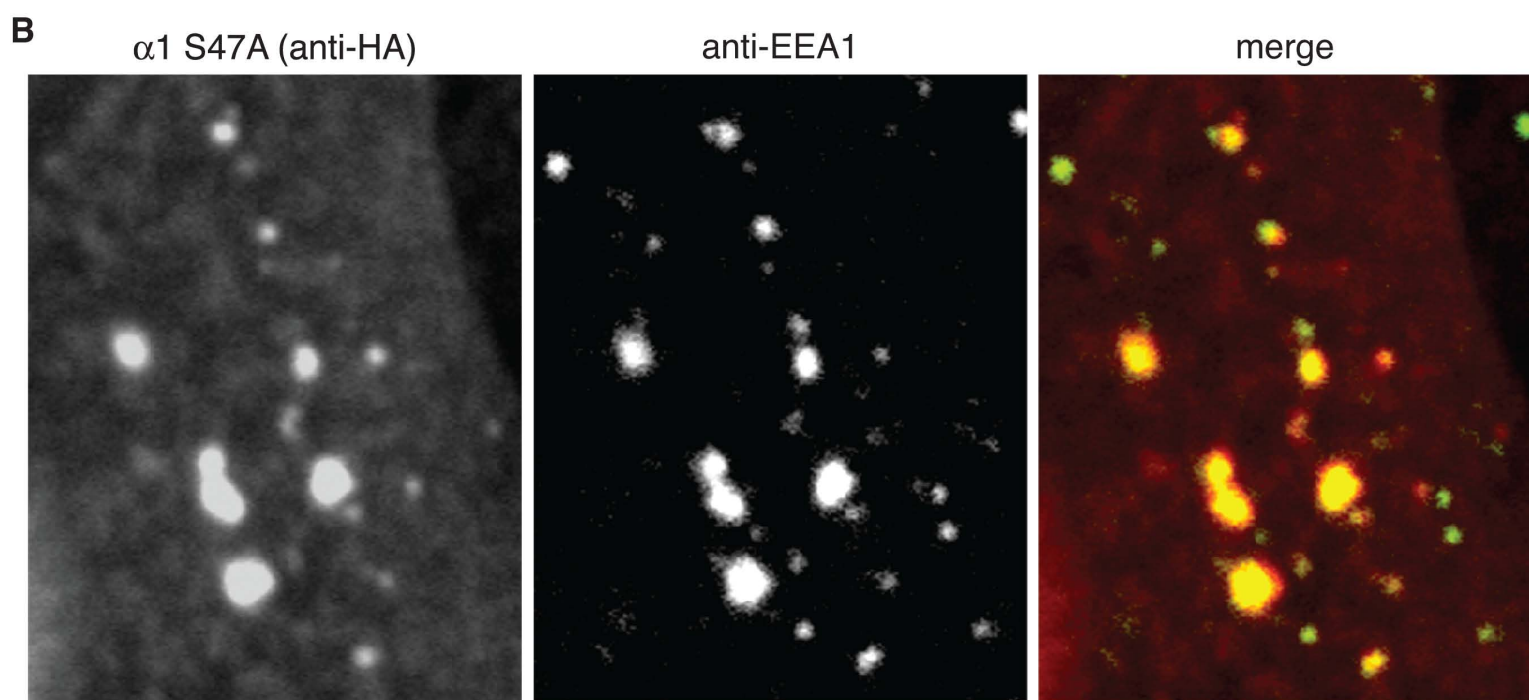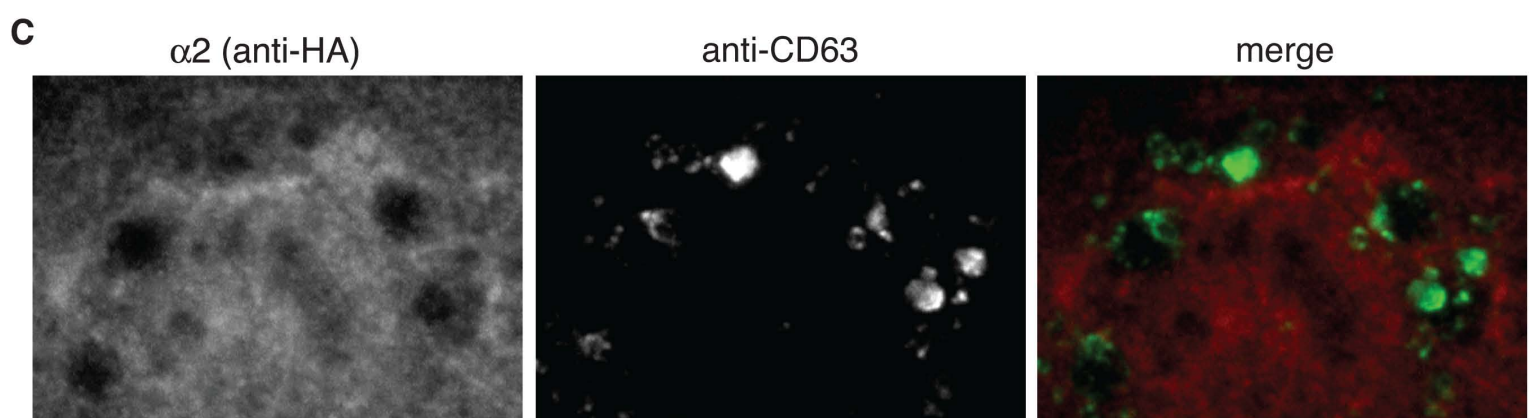



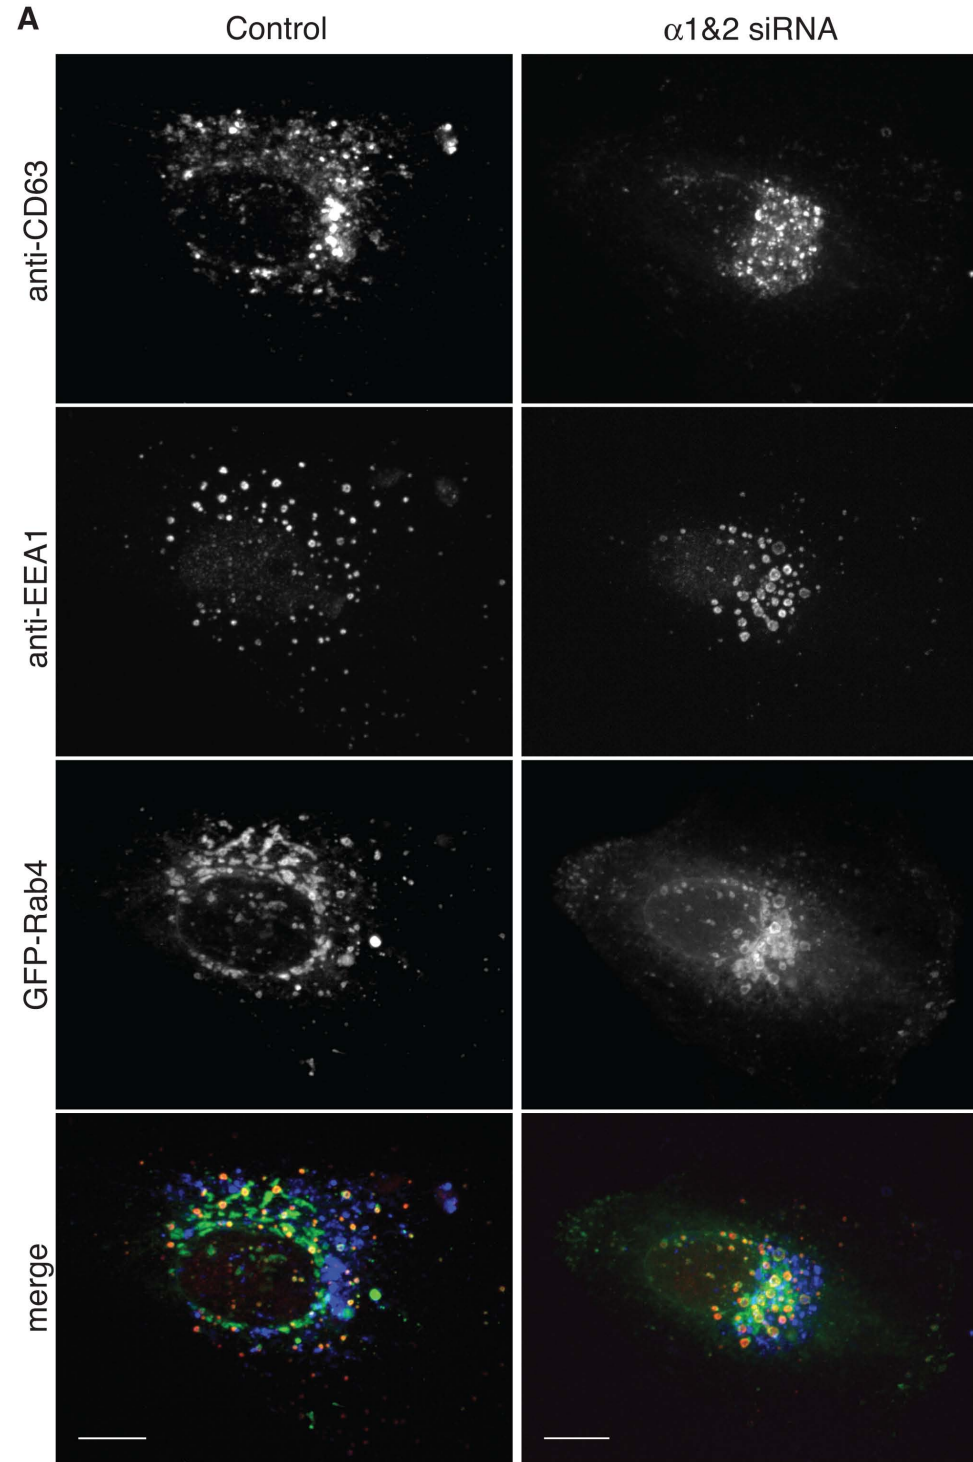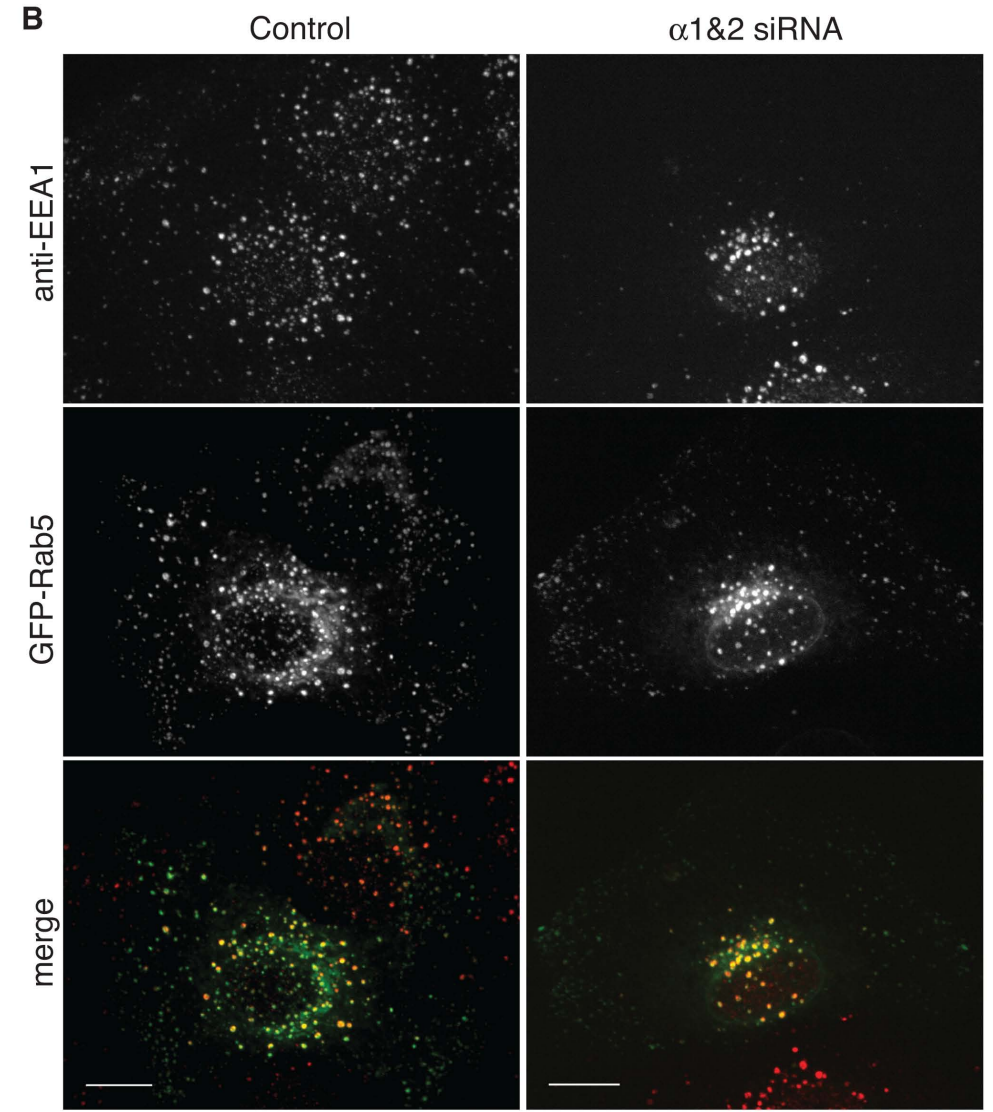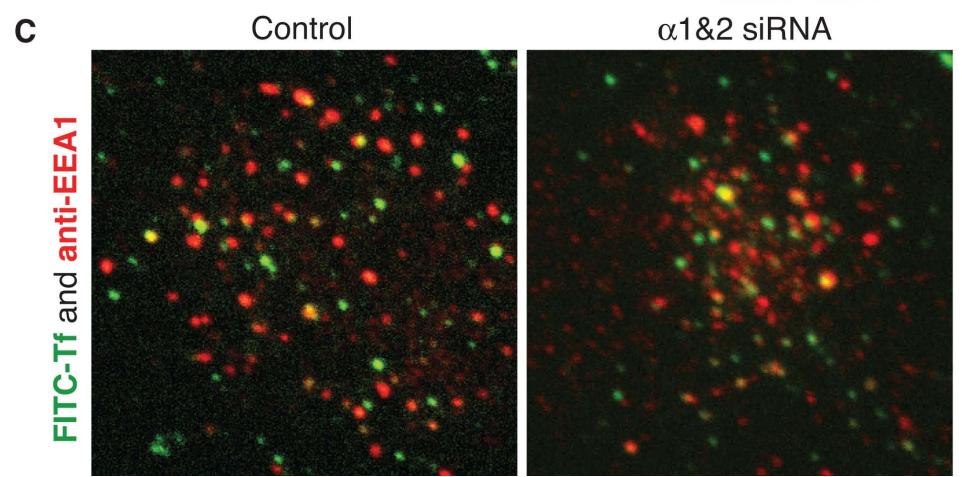

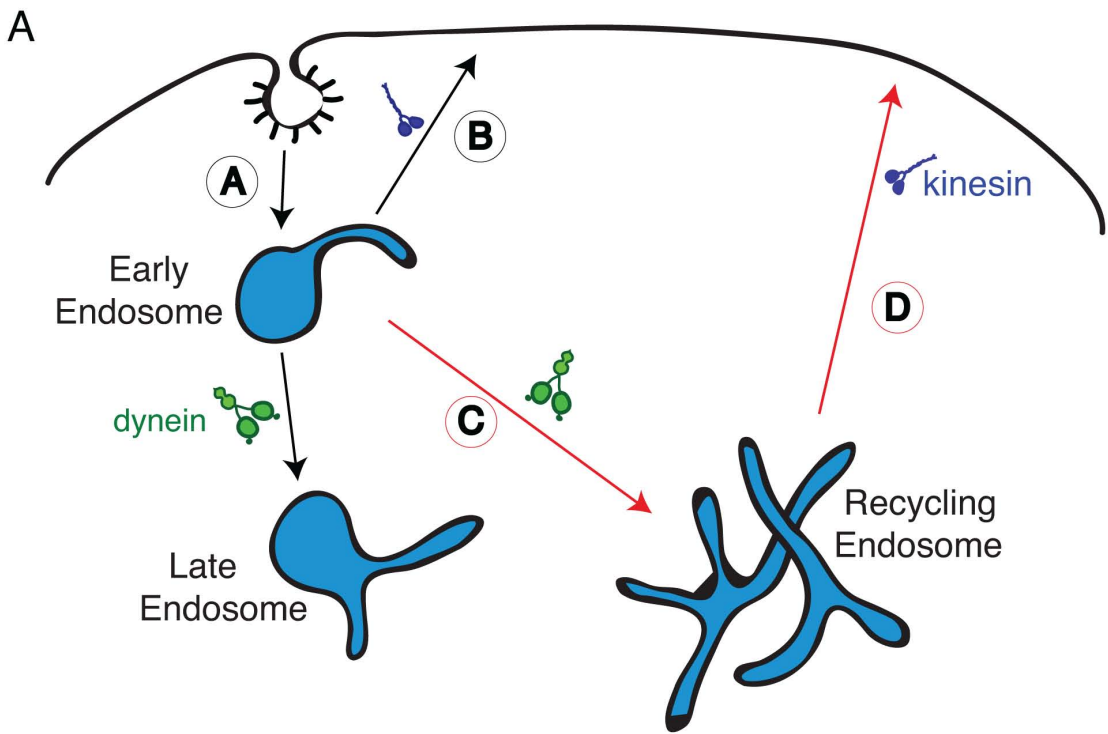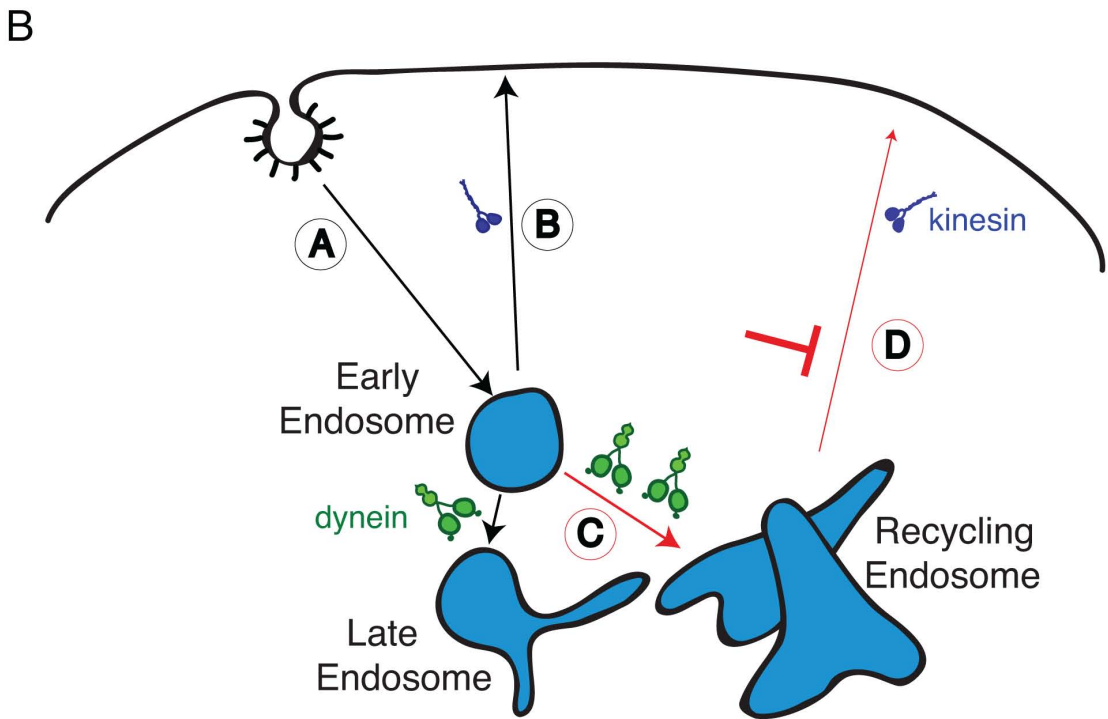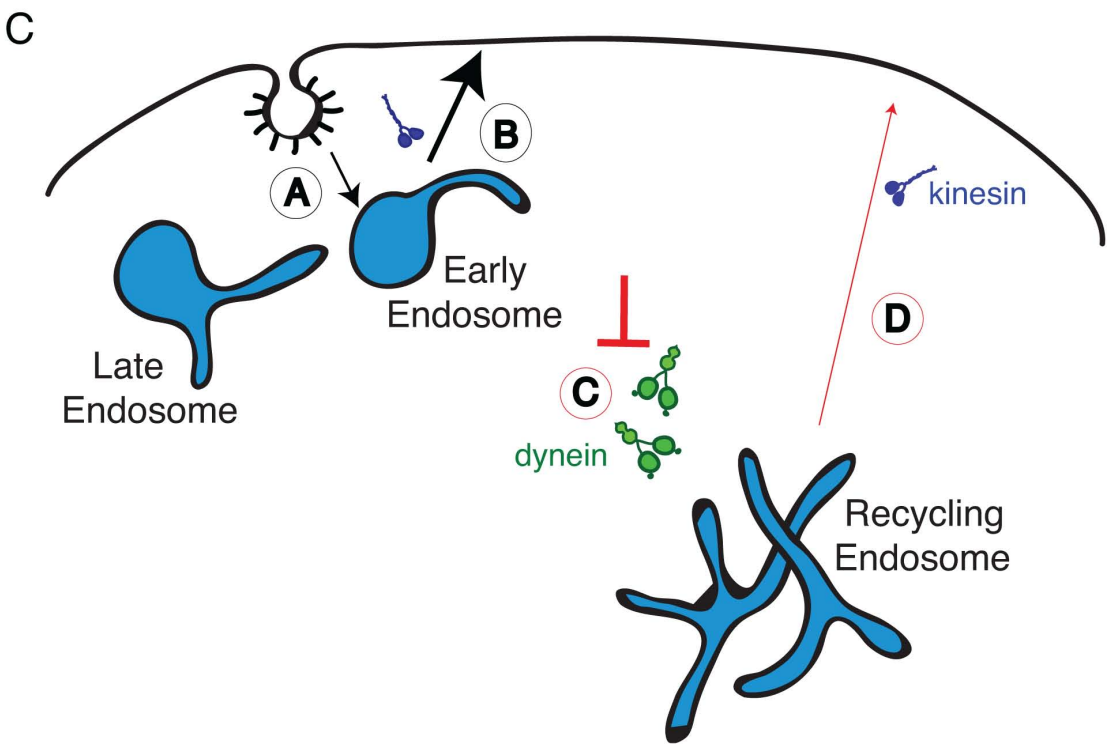

Supplement: E09-12-1064_1.pdf [file E09-12-1064_1.pdf]
